# Supplementary material for: LPCAT1 controls phosphate homeostasis in a zinc-dependent manner
Source: eLife. 2018 Feb 17;7:e32077. doi: 10.7554/eLife.32077 (PMC5826268; doi:10.7554/eLife.32077)
Supplement: Supplementary file 1. [file elife-32077-supp1.xlsx]

## Sheet: Sheet1
Acc. Code	Mean_minusZn	Mean_plusZn	latitude	longitude	Country of Origin
86	8.6466	5.25508	45	1.75	FRA
96	7.43132	5.18422	47.7	6.81667	FRA
149	7.76731	5.74035	48.5167	-4.06667	FRA
204	11.5762	5.38179	47.3833	5.31667	FRA
224	7.75007	6.17412	47.3833	5.31667	FRA
236	8.99305	5.90436	48.6667	-4.06667	FRA
262	8.08727	4.88238	46.65	-0.25	FRA
266	11.4044	6.54669	48.65	-2	FRA
394	7.66028	5.47859	46.65	0.166667	FRA
461	8.08768	4.48577	51.3	0.5	UK
936	10.8626	4.91051	42.3853	-71.1173	USA
1829	10.8875	NA	42.051	-86.509	USA
1874	11.5793	NA	43.595	-86.2657	USA
2057	6.821	NA	42.166	-86.412	USA
2171	13.9575	5.01024	42.148	-86.431	USA
2187	5.86407	6.06395	43.7623	-86.3929	USA
2290	8.67461	7.53257	42.03	-86.514	USA
2320	7.4776	5.00225	43.48	-89.46	USA
5723	6.86666	3.81238	51.3	1	UK
5729	6.94604	4.54707	54.7	-3.4	UK
5731	6.92492	3.46954	54.9	-2.9	UK
5736	6.51549	3.33911	51.3	0.5	UK
5742	5.82634	4.89389	51.3	1.1	UK
5745	7.02451	4.09401	51	-1.5	UK
5751	6.14449	4.20779	57.3	-5.7	UK
5752	6.62223	4.59454	55.7	-3.8	UK
5837	6.29851	4.76934	49.4013	16.2326	CZE
6008	8.23212	4.89075	49.1	16.2	CZE
6016	6.41119	3.70526	62.9	18.4	SWE
6040	10.4149	6.0309	55.66	13.4	SWE
6074	11.6815	7.65502	56.4573	16.1408	SWE
6243	9.08452	6.01838	56.2737	13.9004	SWE
6730	5.01353	3.47933	51.4083	-0.6383	UK
6897	7.79248	5.05319	45	1.3	FRA
6898	5.21397	5.14882	51.2167	4.4	BEL
6899	8.45147	5.91517	49	11	GER
6903	6.36792	4.23453	49.4013	16.2326	CZE
6904	11.4305	5.22448	49.2	16.6166	CZE
6906	7.08373	4.89707	40.2077	-8.42639	POR
6907	8.73921	4.82735	51.4083	-0.6383	UK
6909	9.58737	5.65992	38.3	-92.3	USA
6910	8.94042	6.5929	37.3	15	ITA
6911	9.3217	4.99698	15.1111	-23.6167	CPV
6913	10.9674	7.40516	62.877	18.177	SWE
6915	9.86253	8.03032	50.3	6.3	GER
6916	5.17254	6.09899	58.3	25.3	RUS
6919	8.2652	6.30295	50.3	8	GER
6920	7.55785	4.5489	51.5338	9.9355	GER
6922	6.54083	3.82385	50.3	8	GER
6923	12.7714	4.70594	51.4083	-0.6383	UK
6926	9.9789	5.02727	44.46	-85.37	USA
6928	13.8287	6.60873	41.2816	-86.621	USA
6929	5.30836	3.27164	38.48	68.49	TJK
6930	10.3564	6.23598	49.5	73.1	KAZ
6931	6.888	4.03783	49.5	73.1	KAZ
6932	8.11463	4.45752	47.984	10.8719	GER
6936	7.80398	5.26091	46	3.3	FRA
6937	12.1105	8.4851	49	9.3	GER
6938	9.71748	4.61564	55.7522	37.6322	RUS
6939	10.1152	6.06376	32.34	22.46	LIB
6940	10.6001	6.54489	50.3	8.3	GER
6942	9.71348	6.59487	50	10	SUI
6943	6.9775	4.85219	51.4083	-0.6383	UK
6944	6.90547	5.30922	51.4083	-0.6383	UK
6945	6.44536	5.19166	52.24	4.45	NED
6946	10.6406	6.5135	60.23	6.13	NOR
6951	7.99963	5.49007	49.42	16.36	CZE
6956	9.29034	5.34279	49.42	16.36	CZE
6958	10.3044	6.00054	46	3.3	FRA
6959	12.2776	6.63045	48.5	-1.41	FRA
6960	9.48846	7.48851	48.5	-1.41	FRA
6961	9.49237	4.31802	38.3333	-3.53333	ESP
6962	10.6939	5.26163	38.35	68.48	TJK
6963	8.08678	4.33002	38.35	68.48	TJK
6966	7.79012	4.03905	51.4083	-0.6383	UK
6967	8.56182	6.72044	51.4083	-0.6383	UK
6968	6.79539	5.24597	60	23.5	FIN
6969	7.73608	5.12715	60	23.5	FIN
6970	13.1145	5.56964	41.7194	2.93056	ESP
6971	10.061	7.11986	41.7194	2.93056	ESP
6972	8.32983	5.43824	34.43	136.31	JPN
6973	8.14438	7.39002	56.0648	13.9707	SWE
6975	9.37415	7.04818	48.3	14.45	AUT
6976	8.71673	6.85898	48.3	14.45	AUT
6977	8.55929	6.0203	49.3	-123	CAN
6979	8.48112	7.59627	47.25	8.26	SUI
6980	9.17373	5.78577	52.3	30	RUS
6981	10.3271	9.91524	52.3	30	RUS
6982	7.15008	4.91101	52.3	9.3	GER
6983	5.96811	5.26246	37.45	-119.35	USA
6984	7.45262	5.74378	49.3853	16.2544	CZE
6985	8.58089	4.7373	49.3853	16.2544	CZE
6990	6.87719	3.81445	53.448	5.73	NED
6992	4.95847	3.58328	50.3	5.3	BEL
6994	8.05569	7.27825	45.9	6.13028	FRA
7000	7.45449	5.44208	50.9167	9.57073	GER
7002	6.38979	4.90406	51.3333	6.1	NED
7004	6.24915	4.66259	47.5	7.5	SUI
7014	8.19115	6.72159	56.5459	-4.79821	UK
7015	8.33329	5.51591	41.6833	2.8	ESP
7026	7.10651	6.3182	54.4	-3.2667	UK
7028	8.36531	8.09426	49.5166	9.3166	GER
7031	10.67	5.36816	50.0167	8.6667	GER
7062	7.86743	5.46362	50.2981	8.26607	GER
7071	7.52505	5.02195	48.0717	1.33867	FRA
7075	7.94456	6.57112	43.3779	2.54038	FRA
7081	7.23575	3.66671	40.2077	-8.42639	POR
7092	6.16927	3.09976	49.416	2.823	FRA
7094	10.2828	4.3728	49.8724	8.65081	GER
7098	8.49318	5.57176	47	5	FRA
7102	6.94715	5.34642	50.7224	8.2372	GER
7123	7.0884	4.74554	50.1721	8.38912	GER
7126	7.30862	5.66682	60.1997	24.5682	FIN
7143	10.807	6.18564	51.0167	5.86667	NED
7147	6.94272	4.48969	50.584	8.67825	GER
7163	8.81096	5.1717	52.3721	9.73569	GER
7164	6.78773	4.96178	55.675	12.5686	DEN
7166	7.53823	6.46166	51.25	5.9	NED
7172	7.97719	5.86812	52.1444	9.37827	GER
7176	6.32548	4.89074	50.5	7.5	GER
7178	9.15182	4.94317	49	15	CZE
7181	9.79958	3.76138	50.927	11.587	GER
7192	8.82973	6.1018	55.6395	-5.66364	UK
7199	7.94582	6.35087	50.95	6.9666	GER
7201	10.9325	4.6741	51.3317	6.55934	GER
7205	9.1534	6.1079	49.631	11.5722	GER
7210	6.39672	4.17808	52.7333	15.2333	POL
7224	7.73203	4.79713	50.3833	8.0666	GER
7231	11.3629	5.16734	50.3833	8.0666	GER
7242	7.71339	5.12006	47.6166	7.6666	GER
7244	7.93389	6.96808	50.001	8.26664	GER
7246	8.97717	6.35097	50.8167	8.7667	GER
7255	5.5307	4.42363	50.95	7.5	POL
7262	7.1041	5.16409	50.5	8.5	GER
7268	7.71924	5.19372	52.6969	10.981	GER
7275	9.15447	6.3089	51.0581	13.2995	GER
7276	8.81959	5.25851	50.2	8.5833	GER
7280	10.7368	6.76395	53.1667	8.2	GER
7282	11.6649	7.90523	50.3827	8.01161	GER
7287	8.74077	6.73815	53.3422	8.42255	GER
7291	8.51188	6.41892	38.07	13.22	ITA
7297	10.4423	6.3259	48.5479	9.11033	GER
7299	7.956	6.34547	47.04	10.51	AUT
7300	7.86177	6.62897	41.5	2.25	ESP
7306	10.3986	6.10254	49.2655	-123.206	CAN
7307	8.46226	6.21963	48.0653	-2.96591	FRA
7309	9.00938	7.28573	50.7167	7.1	GER
7310	9.9681	6.29595	50.1448	8.60706	GER
7316	10.2791	7.93982	51.9667	5.56667	NED
7317	13.4529	8.39004	49.1632	-123.137	CAN
7320	6.38844	5.65314	49.4424	1.09849	FRA
7330	12.9694	4.07552	43.0553	141.346	JPN
7331	8.09316	5.60304	51.6832	10.2144	GER
7337	5.50945	4.2413	50.8738	8.02341	GER
7351	10.0821	8.07976	56.4278	-5.23439	UK
7352	6.72406	5.41406	60.0585	23.2982	FIN
7353	7.44017	4.87171	52.08	4.3	NED
7355	12.0919	8.96959	41.96	12.8	ITA
7372	6.57656	4.69144	47.0748	9.9042	AUT
7378	7.84291	5.57344	48.0333	7.7667	GER
7382	9.09608	6.14616	52.0918	5.1145	NED
7384	6.76724	4.43953	52.0333	5.55	NED
7404	7.0667	4.48399	52.6	10.0667	GER
7418	6.00441	5.04307	47.3667	8.55	SUI
7424	8.00693	5.36277	49.2	16.6166	CZE
7477	9.78503	6.20009	41.7302	-71.2825	USA
7514	10.1035	5.48558	41.5609	-86.4251	USA
7515	5.20045	4.81001	41.5609	-86.4251	USA
7516	8.98154	6.27855	55.58	14.334	SWE
7519	8.1591	5.65584	56.14	15.78	SWE
7520	7.35286	5.11514	49.38	16.81	CZE
7521	7.90966	6.15949	49.38	16.81	CZE
7522	8.91991	NA	44.15	9.65	ITA
7523	6.6576	6.42601	42.0945	-86.3253	USA
7524	5.70838	4.55452	42.036	-86.511	USA
7525	5.77096	4.54882	42.036	-86.511	USA
8214	7.28274	4.59866	49	2	FRA
8233	6.1211	5.24135	41.1876	-87.1923	USA
8236	8.98147	6.08792	49.33	15.76	CZE
8240	9.51571	6.68255	55.705	13.196	SWE
8241	8.42539	6.22312	55.9473	13.821	SWE
8243	14.4065	8.17722	43.7703	11.2547	ITA
8249	9.07253	6.9777	57.7	15.8	SWE
8256	6.49726	4.26147	56.4	12.9	SWE
8258	8.85567	6.31293	56.4	12.9	SWE
8259	9.40633	5.68011	56.4	12.9	SWE
8265	7.38138	5.24282	48	19	CZE
8270	8.7408	8.4855	47.5	7.5	SUI
8271	8.50834	5.96804	50.5	9.5	GER
8284	6.65544	6.05309	49.4112	16.2815	CZE
8290	8.80559	7.06918	50	8.5	GER
8296	8.97977	6.11583	53.5	10.5	GER
8297	8.41915	5.34914	46.5	6.08	SUI
8300	8.73713	5.46061	47	15.5	AUT
8306	7.42695	5.47223	56.1	13.74	SWE
8310	7.40181	4.97735	52.24	9.44	GER
8311	9.35675	4.33807	47.5	11.5	AUT
8312	6.64786	6.14634	50.5	7.5	GER
8313	6.73629	5.20154	49	15	CZE
8314	6.05799	3.96157	47	14	AUT
8323	7.36557	4.28935	57	-4	UK
8325	12.4407	7.87742	50	19.3	POL
8329	11.5858	5.57582	48	0.5	FRA
8334	5.72599	3.87445	55.71	13.2	SWE
8337	9.53423	6.05098	44	12.37	ITA
8343	6.4377	4.15888	47.5	1.5	FRA
8348	8.93797	3.70436	50.5	8.5	GER
8354	11.6015	4.80179	58	56.3167	RUS
8365	9.37525	6.17914	49	16	CZE
8366	7.88771	5.56355	50.5	8.5	GER
8369	11.5094	8.47545	55.6942	13.4504	SWE
8374	15.152	8.35118	56.3	34	RUS
8378	13.601	5.19248	49.49	14.24	CZE
8387	8.83021	6.1893	59	18	SWE
8388	7.73244	5.83179	52	36	RUS
8395	6.69459	5.46079	45	7.5	ITA
8420	5.86872	3.79638	50.0667	8.5333	GER
8430	8.53106	4.76869	52.25	4.5667	NED
9104	8.53821	5.55174	41.8296	46.2831	GEO
9165	9.67645	4.91599	50.4625	30.5411	UKR
9302	6.66375	3.55148	55.9681	-3.21833	UK
9308	14.1594	7.08856	57.9	-5.1525	UK
100000	6.15206	4.06645	54.6833	25.3167	LTU
