# Supplementary material for: LPCAT1 controls phosphate homeostasis in a zinc-dependent manner
Source: eLife. 2018 Feb 17;7:e32077. doi: 10.7554/eLife.32077 (PMC5826268; doi:10.7554/eLife.32077)
Supplement: Supplementary file 2. [file elife-32077-supp2.xlsx]

## Sheet: tableS2_FDR_threshhold_0.1_1424
Chromosome	SNP Position	LOD Score	MAF	MAC	FDR	Gene ID	description	Gene Start	Gene End
1	4306845	7.23178	0.0807175	18	0.0120836	AT1G12640	Lysophospholipid acyltransferase 1 [Source:UniProtKB/Swiss-Prot;Acc:F4IDU4]	4303280	4305907
1	4306845	7.23178	0.0807175	18	0.0120836	AT1G12650	At1g12650/T12C24_1 [Source:UniProtKB/TrEMBL;Acc:Q8W1E4]	4305791	4308007
1	4306845	7.23178	0.0807175	18	0.0120836	AT1G12660	Predicted to encode a PR (pathogenesis-related) protein. Belongs to the plant thionin (PR-13) family with the following members: At1g66100, At5g36910, At1g72260, At2g15010, At1g12663, At1g12660. [Source:TAIR;Acc:AT1G12660]	4308943	4309749
3	8155736	6.11726	0.233184	52	0.0776912	AT3G22970	At3g22970 [Source:UniProtKB/TrEMBL;Acc:Q9LIJ8]	8152038	8154149
3	8155736	6.11726	0.233184	52	0.0776912	AT3G04365		8154990	8155206
5	17414516	5.75315	0.331839	74	0.0776912	AT5G43360	Probable inorganic phosphate transporter 1-3 [Source:UniProtKB/Swiss-Prot;Acc:O48639]	17409524	17411214
5	17414516	5.75315	0.331839	74	0.0776912	AT5G43370	Probable inorganic phosphate transporter 1-2 [Source:UniProtKB/Swiss-Prot;Acc:Q96243]	17415698	17417972
1	4305862	5.72853	0.0986547	22	0.0776912	AT1G12640	Lysophospholipid acyltransferase 1 [Source:UniProtKB/Swiss-Prot;Acc:F4IDU4]	4303280	4305907
1	4305862	5.72853	0.0986547	22	0.0776912	AT1G12650	At1g12650/T12C24_1 [Source:UniProtKB/TrEMBL;Acc:Q8W1E4]	4305791	4308007
1	4305862	5.72853	0.0986547	22	0.0776912	AT1G12660	Predicted to encode a PR (pathogenesis-related) protein. Belongs to the plant thionin (PR-13) family with the following members: At1g66100, At5g36910, At1g72260, At2g15010, At1g12663, At1g12660. [Source:TAIR;Acc:AT1G12660]	4308943	4309749
1	11361064	5.66458	0.0717489	16	0.0776912	AT1G31720	At1g31720 [Source:UniProtKB/TrEMBL;Acc:A2RVU1]	11356076	11358095
1	11361064	5.66458	0.0717489	16	0.0776912	AT1G31730	AP-4 complex subunit epsilon [Source:UniProtKB/Swiss-Prot;Acc:Q8L7A9]	11359512	11364288
5	17401698	5.64545	0.318386	71	0.0776912	AT5G43350	Inorganic phosphate transporter 1-1 [Source:UniProtKB/Swiss-Prot;Acc:Q8VYM2]	17399769	17402158
4	7825763	5.53619	0.116592	26	0.0807517	AT4G13460	Histone-lysine N-methyltransferase family member SUVH9 [Source:UniProtKB/Swiss-Prot;Acc:Q9T0G7]	7823894	7827004
5	17401664	5.45905	0.318386	71	0.0807517	AT5G43350	Inorganic phosphate transporter 1-1 [Source:UniProtKB/Swiss-Prot;Acc:Q8VYM2]	17399769	17402158
5	17409850	5.41624	0.336323	75	0.0807517	AT5G43360	Probable inorganic phosphate transporter 1-3 [Source:UniProtKB/Swiss-Prot;Acc:O48639]	17409524	17411214
5	17409770	5.40682	0.300448	67	0.0807517	AT5G43360	Probable inorganic phosphate transporter 1-3 [Source:UniProtKB/Swiss-Prot;Acc:O48639]	17409524	17411214
1	11363283	5.26079	0.0717489	16	0.0869452	AT1G31730	AP-4 complex subunit epsilon [Source:UniProtKB/Swiss-Prot;Acc:Q8L7A9]	11359512	11364288
1	11363283	5.26079	0.0717489	16	0.0869452	AT1G31740	Beta-galactosidase 15 [Source:UniProtKB/Swiss-Prot;Acc:Q9C6W4]	11365285	11369839
1	11363877	5.26079	0.0717489	16	0.0869452	AT1G31730	AP-4 complex subunit epsilon [Source:UniProtKB/Swiss-Prot;Acc:Q8L7A9]	11359512	11364288
1	11363877	5.26079	0.0717489	16	0.0869452	AT1G31740	Beta-galactosidase 15 [Source:UniProtKB/Swiss-Prot;Acc:Q9C6W4]	11365285	11369839
1	11361713	5.26079	0.0717489	16	0.0869452	AT1G31720	At1g31720 [Source:UniProtKB/TrEMBL;Acc:A2RVU1]	11356076	11358095
1	11361713	5.26079	0.0717489	16	0.0869452	AT1G31730	AP-4 complex subunit epsilon [Source:UniProtKB/Swiss-Prot;Acc:Q8L7A9]	11359512	11364288
1	11361713	5.26079	0.0717489	16	0.0869452	AT1G31740	Beta-galactosidase 15 [Source:UniProtKB/Swiss-Prot;Acc:Q9C6W4]	11365285	11369839
