# Supplementary material for: LPCAT1 controls phosphate homeostasis in a zinc-dependent manner
Source: eLife. 2018 Feb 17;7:e32077. doi: 10.7554/eLife.32077 (PMC5826268; doi:10.7554/eLife.32077)
Supplement: Supplementary file 3. [file elife-32077-supp3.xlsx]

## Sheet: S_Table3
accession	sequence	central_base	Pi concentration in +Zn	Pi concentration in -Zn
Aa-0	gtgtcgaa	GA	5.44208358	7.45449365
Bla-1	gtgtcgaa	GA	5.51590748	8.33328875
Bor-1	gtgtcgaa	GA	4.76933645	6.29851268
Bor-4	gtgtcgaa	GA	4.23453355	6.36791746
Bs-1	gtgtcgaa	GA	8.48549562	8.74079588
Bsch-0	gtgtcgaa	GA	5.36815976	10.6700491
Bu-0	gtgtcgaa	GA	5.96804161	8.50834206
C24	gtgtcgaa	GA	4.89707248	7.0837264
Ca-0	gtgtcgaa	GA	5.46362389	7.86743385
Chat-1	gtgtcgaa	GA	5.02194756	7.52505437
CIBC-17	gtgtcgaa	GA	4.82734503	8.73921409
CIBC-5	gtgtcgaa	GA	3.47933397	5.01353138
Co	gtgtcgaa	GA	3.66671335	7.23575172
Com-1	gtgtcgaa	GA	3.09975715	6.16927493
Ct-1	gtgtcgaa	GA	6.59289613	8.94041885
Dem-4	gtgtcgaa	GA	5.2413461	6.12109584
Do-0	gtgtcgaa	GA	5.3464203	6.94714988
Ha-0	gtgtcgaa	GA	5.17170467	8.810963
Hau-0	gtgtcgaa	GA	4.96178032	6.78773492
Kin-0	gtgtcgaa	GA	5.02727376	9.97890104
Ms-0	gtgtcgaa	GA	4.6156442	9.71747766
Mt-0	gtgtcgaa	GA	6.06375862	10.1152381
St-0	gtgtcgaa	GA	6.189296788	8.830210708
Ste-3	gtgtcgaa	GA	7.53257036	8.6746105
Tamm-2	gtgtcgaa	GA	5.24596714	6.79538731
Tamm-27	gtgtcgaa	GA	5.12715017	7.73607615
Tha-1	gtgtcgaa	GA	4.87171226	7.44017133
Tottarp-2	gtgtcgaa	GA	6.01837824	9.08451812
Tscha-1	gtgtcgaa	GA	4.69144192	6.57656138
Tsu-1	gtgtcgaa	GA	5.43823785	8.32982981
Col-0	gtgtcgaa	GA	5.6599176	9.58737146
Ag-0	gtgtcgaa	GA	5.05319258	7.79247819
Amel-1	gtgtcgaa	GA	3.81444828	6.8771875
An-1	gtgtcgaa	GA	5.14882101	5.21396827
Ang-0	gtgtcgaa	GA	3.58327915	4.95846887
Ann-1	gtgtcgaa	GA	7.27824714	8.05568681
Ba-1	gtgtcgaa	GA	6.72158574	8.19115425
Bå1-2	gtgtcgaa	GA	4.26147396	6.49725867
Bå4-1	gtgtcgaa	GA	6.31292833	8.85567024
Bâ5-1	gtgtcgaa	GA	5.68010601	9.40633163
Baa-1	gtgtcgaa	GA	4.90406371	6.38979334
Bch-1	gtgtcgaa	GA	8.09426424	8.36530647
Blh-1	gtgtcgaa	GA	5.24282434	7.3813787
Boot-1	gtgtcgaa	GA	6.3181962	7.10650939
Duk	gtgtcgaa	GA	4.89075132	8.23211564
Eden-2	gtgtcgaa	GA	7.40516224	10.9673625
Eds-1	gtgtcgaa	GA	3.70526311	6.41118936
Ema-1	gtgtcgaa	GA	3.33911055	6.51548937
En-1	gtgtcgaa	GA	7.06918082	8.80558568
Es-0	gtgtcgaa	GA	5.66681966	7.3086231
Est-1	gtgtcgaa	GA	6.09899038	5.17253557
Ga-0	gtgtcgaa	GA	6.30294801	8.26519977
Ge-0	gtgtcgaa	GA	5.34914061	8.4191512
Gel-1	gtgtcgaa	GA	6.18564115	10.806962
Gie-0	gtgtcgaa	GA	4.48968966	6.94272167
Got-22	gtgtcgaa	GA	4.54889874	7.55785073
Gr-1	gtgtcgaa	GA	5.46060603	8.7371314
Gu-0	gtgtcgaa	GA	3.82384992	6.54082842
Gy-0	gtgtcgaa	GA	4.59866272	7.28273627
Hey-1	gtgtcgaa	GA	6.46165965	7.53823426
Hov4-1	gtgtcgaa	GA	7.42695	5.47223
HR-10	gtgtcgaa	GA	4.70594058	12.7713905
Hs-0	gtgtcgaa	GA	4.97734746	7.40180791
Is-0	gtgtcgaa	GA	6.1463373	6.64786149
Je-0	gtgtcgaa	GA	3.76138002	9.79957806
Jl-3	gtgtcgaa	GA	5.36277154	8.00692939
Jm-0	gtgtcgaa	GA	5.20154234	6.73628692
Kelsterbach-4	gtgtcgaa	GA	3.79638344	5.868723788
Kil-0	gtgtcgaa	GA	6.10179792	8.82973131
Kl-5	gtgtcgaa	GA	6.35087359	7.94581796
Kni-1	gtgtcgaa	GA	6.03090205	10.4149321
Kno-18	gtgtcgaa	GA	6.60872765	13.8286886
Kondara	gtgtcgaa	GA	3.27163651	5.3083583
Kulturen-1	gtgtcgaa	GA	6.68254886	9.51570991
Lan-1	gtgtcgaa	GA	4.59453618	6.62222955
Ler-1	gtgtcgaa	GA	4.45751914	8.11462831
Liarum	gtgtcgaa	GA	6.22311818	8.42538982
Lip-0	gtgtcgaa	GA	7.87742081	12.4407196
Lisse	gtgtcgaa	GA	4.768693743	8.531056663
Lm-2	gtgtcgaa	GA	5.57581886	11.5857516
Lp2-2	gtgtcgaa	GA	5.11514318	7.35285572
Lp2-6	gtgtcgaa	GA	6.15949456	7.90965761
Lu-1	gtgtcgaa	GA	3.87445077	5.72598618
Mh-0	gtgtcgaa	GA	4.42362685	5.53070338
Mir-0	gtgtcgaa	GA	6.050979748	9.534232005
Mnz-0	gtgtcgaa	GA	6.9680808	7.93389353
Mz-0	gtgtcgaa	GA	6.54488658	10.6000923
Nd-1	gtgtcgaa	GA	6.59486837	9.71348287
NFA-10	gtgtcgaa	GA	4.85218904	6.9774983
NFA-8	gtgtcgaa	GA	5.30922124	6.90546824
No-0	gtgtcgaa	GA	6.30889668	9.15447005
Nok-3	gtgtcgaa	GA	5.19165847	6.44536357
Np-0	gtgtcgaa	GA	5.19371526	7.71923568
Nw-0	gtgtcgaa	GA	3.704357078	8.937974761
Old-1	gtgtcgaa	GA	6.76394888	10.736754
Or-0	gtgtcgaa	GA	7.90523407	11.6649428
Ove-0	gtgtcgaa	GA	6.73815278	8.74076797
Oy-0	gtgtcgaa	GA	6.51350185	10.6405948
Per-1	gtgtcgaa	GA	4.801792938	11.60148566
Pla-0	gtgtcgaa	GA	6.62896758	7.86176851
Pna-17	gtgtcgaa	GA	6.4260076	6.65759779
Pog-0	gtgtcgaa	GA	6.10254231	10.3986032
Pu2-7	gtgtcgaa	GA	5.34278869	9.2903414
Pu2-23	gtgtcgaa	GA	5.49007188	7.99963372
Ra-0	gtgtcgaa	GA	6.00053953	10.3043515
Rak-2	gtgtcgaa	GA	6.179136936	9.375249107
Ren-1	gtgtcgaa	GA	6.63044708	12.2775708
Ren-11	gtgtcgaa	GA	7.48851151	9.48846364
Rev-1	gtgtcgaa	GA	8.475449025	11.50935801
Rhen-1	gtgtcgaa	GA	7.93981653	10.2791464
Ri-0	gtgtcgaa	GA	8.39003951	13.4529111
Rmx-A02	gtgtcgaa	GA	4.55451799	5.70837813
Rmx-A180	gtgtcgaa	GA	4.5488159	5.77096421
Rou-0	gtgtcgaa	GA	5.65314018	6.38843653
Rsch-4	gtgtcgaa	GA	8.351177146	15.15199849
Se-0	gtgtcgaa	GA	4.31802019	9.49237294
Si-0	gtgtcgaa	GA	4.24129871	5.50945003
Sorbo	gtgtcgaa	GA	4.33001527	8.08678387
Sq-1	gtgtcgaa	GA	4.0390524	7.79012403
Sq-8	gtgtcgaa	GA	6.72044323	8.56181834
Tu-0	gtgtcgaa	GA	5.460787705	6.694591949
Uk-1	gtgtcgaa	GA	5.5734361	7.84291207
Ull2-3	gtgtcgaa	GA	7.39001593	8.14437663
Uod-1	gtgtcgaa	GA	7.04818159	9.37415073
Uod-7	gtgtcgaa	GA	6.85897666	8.71672711
Utrecht	gtgtcgaa	GA	6.14615929	9.09608246
Vår2-1	gtgtcgaa	GA	6.27854584	8.98153843
Ven-1	gtgtcgaa	GA	4.43952612	6.76723582
Vimmerby	gtgtcgaa	GA	6.97770416	9.07253309
Wc-1	gtgtcgaa	GA	4.48399246	7.06670489
Wei-0	gtgtcgaa	GA	7.59626824	8.48112113
Wil-1	gtgtcgaa	GA	4.066447268	6.152062949
Ws-0	gtgtcgaa	GA	5.78577051	9.1737271
Ws-2	gtgtcgaa	GA	9.9152386	10.3270506
Wt-5	gtgtcgaa	GA	4.91101091	7.15007928
Yo-0	gtgtcgaa	GA	5.26245501	5.96810753
Zdr-1	gtgtcgaa	GA	5.74378459	7.45261824
Zu-1	gtgtcgaa	GA	5.04307228	6.00441328
WAR	gtgtcgaa	GA	6.20008779	9.7850282
Ty-0	gtgtcgaa	GA	8.0797601	10.0820986
Stw-0	gtgtcgaa	GA	5.831787745	7.732442753
Sha	gtgtcgaa	GA	5.26163142	10.6938603
RRs-10	gtgtcgaa	GA	4.81000765	5.20044803
RRS-7	gtgtcgaa	GA	5.48557556	10.103458
Rd-0	gtgtcgaa	GA	5.563545291	7.887709461
Paw-26	gtgtcgaa	GA	5.01024095	13.9574629
Mdn-1	gtgtcgaa	GA	NA	10.8875332
Li-7	gtgtcgaa	GA	5.16733544	11.3629418
Lag1-6	gtgtcgaa	GA	5.55174139	8.538205216
Kz-9	gtgtcgaa	GA	4.03782745	6.88800237
Hi-0	gtgtcgaa	GA	5.47223389	7.42694983
DraII-1	gtgtcgaa	GA	6.05309133	6.65544009
Cvi-0	gtgtcaca	AC	4.99698102	9.32169956
Ts-1	gtgtcaca	AC	5.56964337	13.1144623
Ts-5	gtgtcaca	AC	7.11985858	10.0609691
Van-0	gtgtcaca	AC	6.02030445	8.55928918
Br-0	gtgtcaca	AC	5.22447937	11.4305206
Ei-2	gtgtcaca	AC	8.03031705	9.86253485
In-0	gtgtcaca	AC	4.33806629	9.35674955
Ob-0	gtgtcaca	AC	5.258508	8.81959046
Sap-0	gtgtcaca	AC	5.192483961	13.60100831
PHW-2	gtgtcaca	AC	8.17721855	14.4064503
Alc-0	gtgtcaaa	AA	5.37978	3.89516
